# Supplementary material for: STREAMING-tag system reveals spatiotemporal relationships between transcriptional regulatory factors and transcriptional activity
Source: PubMed Central journal article supplement (PMC9768169; doi:10.1038/s41467-022-35286-2), 2022-12-20
Supplement: 41467_2022_35286_MOESM3_ESM.pdf [file 41467_2022_35286_MOESM3_ESM.pdf]

### **Descriptions of Additional Supplementary Files**

**Supplementary Data 1:** Cell lines used in this study

**Supplementary Data 2:** Plasmids used in this study

**Supplementary Data 3:** Southern blot probes and primers used to generate the probes

**Supplementary Data 4:** Nucleotide sequences of smFISH probes used in this study

**Supplementary Movie 1.** Dynamics of MS2 coat protein (MCP) and mTetR spots in NStNLS-SNAP cells. NSt-NLS-SNAP cells were treated with SNAP-Cell 647-SiR immediately before imaging. The movie shows a maximum intensity projection-processed timelapse image of NSt-NLS-SNAP cells captured at 15 s intervals. Scale bar, 5  $\mu\text{m}$ .
